# Supplementary material for: Clinical evaluation of commercial nucleic acid amplification tests in patients with suspected sepsis
Source: PubMed Central journal article supplement (PMC4419503; doi:10.1186/s12879-015-0938-4), 2015-04-28
Supplement: 12879_2015_938_MOESM1_ESM.pdf [file 12879_2015_938_MOESM1_ESM.pdf]

**Additional file 1.** All 77 episodes for which at least one microbial finding judged as clinically relevant or of unknown significance was detected with blood culture and/or NAATs.

| No. | Blood culture results (proportion positive blood culture bottles)                 | Other microbiological findings      | Multiplex PCR results                                      | Microarray results                                        | Clinical comments                                                                                                                                               |
|-----|-----------------------------------------------------------------------------------|-------------------------------------|------------------------------------------------------------|-----------------------------------------------------------|-----------------------------------------------------------------------------------------------------------------------------------------------------------------|
| 1   | <i>Escherichia coli</i> (1/4) <sup>a</sup>                                        | -                                   | neg                                                        | neg                                                       | <i>E. coli</i> is clinically relevant. Diagnosis: acute pyelonephritis due to <i>E. coli</i> . No SS. LoS 8 days.                                               |
| 2   | <i>Enterococcus faecalis</i> (1/4) <sup>a</sup>                                   | Urine: <i>Enterococcus faecalis</i> | neg                                                        | neg                                                       | <i>E. faecalis</i> is clinically relevant. Diagnosis: acute pyelonephritis due to <i>E. faecalis</i> . No SS. LoS 7 days.                                       |
| 3   | <i>Enterococcus faecalis</i> (1/4) <sup>a</sup>                                   | Urine: <i>Enterococcus faecalis</i> | neg                                                        | neg                                                       | <i>E. faecalis</i> is clinically relevant. Diagnosis: acute pyelonephritis due to <i>E. faecalis</i> . No SS. LoS 8 days.                                       |
| 4   | <i>Escherichia coli</i> (2/2)                                                     | Urine: <i>Escherichia coli</i>      | neg                                                        | <i>Escherichia coli</i>                                   | <i>E. coli</i> is clinically relevant. Diagnosis: acute pyelonephritis due to <i>E. coli</i> . No SS. LoS 5 days.                                               |
| 5   | <i>Escherichia coli</i> (2/2) <sup>a</sup>                                        | Urine: <i>Escherichia coli</i>      | neg                                                        | neg                                                       | <i>E. coli</i> is clinically relevant. Diagnosis: acute pyelonephritis due to <i>E. coli</i> . No SS. LoS 10 days.                                              |
| 6   | <i>Escherichia coli</i> (2/4)                                                     | Urine: <i>Escherichia coli</i>      | <i>Escherichia coli</i> ,<br><i>Enterococcus faecalis</i>  | <i>Escherichia coli</i>                                   | <i>E. coli</i> is clinically relevant, <i>E. faecalis</i> is OUS. Diagnosis: acute pyelonephritis. No SS. LoS 1 day.                                            |
| 7   | <i>Escherichia coli</i> (2/4)                                                     | Urine: <i>Escherichia coli</i>      | <i>Escherichia coli</i>                                    | <i>Escherichia coli</i>                                   | <i>E. coli</i> is clinically relevant. Diagnosis: acute pyelonephritis due to <i>E. coli</i> . No SS. LoS 8 days.                                               |
| 8   | <i>Escherichia coli</i> (2/4) <sup>a</sup>                                        | -                                   | neg                                                        | neg                                                       | <i>E. coli</i> is clinically relevant. Diagnosis: acute cholecystitis due to <i>E. coli</i> . No SS. LoS 2 days.                                                |
| 9   | <i>Escherichia coli</i> (3/4)                                                     | Urine: <i>Escherichia coli</i>      | <i>Escherichia coli</i> ,<br><i>Pseudomonas aeruginosa</i> | <i>Escherichia coli</i>                                   | <i>E. coli</i> is clinically relevant, <i>P. aeruginosa</i> is OUS. Diagnosis: acute pyelonephritis due to <i>E. coli</i> . No SS. LoS 1 day.                   |
| 10  | <i>Escherichia coli</i> (3/4)                                                     | -                                   | <i>Escherichia coli</i>                                    | <i>Escherichia coli</i>                                   | <i>E. coli</i> is clinically relevant. Diagnosis: acute cholecystitis. No SS. LoS 16 days.                                                                      |
| 11  | <i>Escherichia coli</i> (3/4)                                                     | -                                   | neg                                                        | <i>Escherichia coli</i>                                   | <i>E. coli</i> is clinically relevant. Diagnosis: acute pyelonephritis due to <i>E. coli</i> . No SS. LoS 3 days.                                               |
| 12  | <i>Escherichia coli</i> (4/4)                                                     | -                                   | <i>Escherichia coli</i>                                    | <i>Escherichia coli</i>                                   | <i>E. coli</i> is clinically relevant. Diagnosis: acute cholangitis due to <i>E. coli</i> . No SS. LoS 3 days.                                                  |
| 13  | <i>Escherichia coli</i> (2/2),<br><i>Klebsiella pneumoniae</i> (2/2) <sup>a</sup> | -                                   | <i>Escherichia coli</i>                                    | <i>Escherichia coli</i>                                   | <i>E. coli</i> and <i>K. pneumoniae</i> are clinically relevant. Diagnosis: acute cholangitis due to <i>E. coli</i> and <i>K. pneumoniae</i> . SS. LoS 10 days. |
| 14  | <i>Escherichia coli</i> (2/4),<br><i>Klebsiella pneumoniae</i> (2/4)              | -                                   | neg                                                        | <i>Escherichia coli</i> ,<br><i>Klebsiella pneumoniae</i> | <i>E. coli</i> and <i>K. pneumoniae</i> are clinically relevant. Diagnosis: acute cholangitis. SS. LoS 12 days.                                                 |
| 15  | <i>Klebsiella oxytoca</i> (4/4)                                                   | Urine: <i>Klebsiella oxytoca</i>    | neg                                                        | <i>Klebsiella oxytoca</i>                                 | <i>K. oxytoca</i> is clinically relevant. Diagnosis: acute pyelonephritis due to <i>K. oxytoca</i> . No SS. LoS 6 days.                                         |

|    |                                                 |                                                                                                     |                                                          |                               |                                                                                                                                                        |
|----|-------------------------------------------------|-----------------------------------------------------------------------------------------------------|----------------------------------------------------------|-------------------------------|--------------------------------------------------------------------------------------------------------------------------------------------------------|
| 16 | <i>Klebsiella pneumoniae</i> (1/4) <sup>a</sup> | Urine: <i>Escherichia coli</i>                                                                      | <i>Staphylococcus aureus</i>                             | neg                           | <i>K. pneumoniae</i> is clinically relevant, <i>S. aureus</i> is OUS. Diagnosis: lymphoma and pneumonia due to <i>K. pneumoniae</i> . SS. LoS 26 days. |
| 17 | <i>Klebsiella pneumoniae</i> (4/4)              | NPH: <i>Streptococcus</i> group G; urine: <i>Klebsiella pneumoniae</i>                              | <i>Klebsiella pneumoniae</i>                             | <i>Klebsiella pneumoniae</i>  | <i>K. pneumoniae</i> is clinically relevant. Diagnosis: acute cholangitis due to <i>K. pneumoniae</i> . SS. LoS 26 days. Gall bladder cancer.          |
| 18 | <i>Klebsiella pneumoniae</i> (4/4)              | NPH, urine: <i>Klebsiella pneumoniae</i>                                                            | neg                                                      | <i>Klebsiella pneumoniae</i>  | <i>K. pneumoniae</i> is clinically relevant. Diagnosis: acute pyelonephritis due to <i>K. pneumoniae</i> . No SS. LoS 4 days.                          |
| 19 | <i>Pseudomonas aeruginosa</i> (1/4)             | -                                                                                                   | neg                                                      | <i>Pseudomonas aeruginosa</i> | <i>P. aeruginosa</i> is clinically relevant. Diagnosis: cellulitis due to <i>P. aeruginosa</i> . No SS. LoS 12 days.                                   |
| 20 | <i>Proteus mirabilis</i> (4/4)                  | Urine: <i>Proteus mirabilis</i>                                                                     | <i>Proteus mirabilis</i>                                 | <i>Proteus mirabilis</i>      | <i>P. mirabilis</i> is clinically relevant. Diagnosis: acute pyelonephritis due to <i>P. mirabilis</i> . SS. LoS 6 days.                               |
| 21 | <i>Staphylococcus aureus</i> (1/4)              | -                                                                                                   | <i>Staphylococcus aureus</i>                             | <i>Staphylococcus aureus</i>  | <i>S. aureus</i> is clinically relevant. Diagnosis: <i>S. aureus</i> bacteraemia. Septic shock. LoS 1 day. Diseased.                                   |
| 22 | <i>Staphylococcus aureus</i> (2/4)              | Urine: <i>Staphylococcus aureus</i> ; wound: <i>Staphylococcus aureus</i> , <i>Escherichia coli</i> | neg                                                      | <i>Staphylococcus aureus</i>  | <i>S. aureus</i> is clinically relevant. Diagnosis: post-operative wound infection. No SS. LoS 16 days.                                                |
| 23 | <i>Staphylococcus aureus</i> (3/4)              | Wound: <i>Staphylococcus aureus</i>                                                                 | <i>Staphylococcus aureus</i>                             | <i>Staphylococcus aureus</i>  | <i>S. aureus</i> is clinically relevant. Diagnosis: skin infection. Abscess left leg. No SS. LoS 5 days.                                               |
| 24 | <i>Staphylococcus aureus</i> (3/4)              | -                                                                                                   | neg                                                      | <i>Staphylococcus aureus</i>  | <i>S. aureus</i> is clinically relevant. Diagnosis: <i>S. aureus</i> bacteraemia. No SS. LoS 7 days.                                                   |
| 25 | <i>Staphylococcus aureus</i> (4/4)              | -                                                                                                   | <i>Staphylococcus aureus</i>                             | <i>Staphylococcus aureus</i>  | <i>S. aureus</i> is clinically relevant. Diagnosis: clinical central line infection. Severe sepsis. LoS 4 days.                                        |
| 26 | <i>Staphylococcus aureus</i> (4/4)              | -                                                                                                   | <i>Staphylococcus aureus</i>                             | <i>Staphylococcus aureus</i>  | <i>S. aureus</i> is clinically relevant. Diagnosis: <i>S. aureus</i> bacteraemia, spondylodiscitis, epidural abscess. No SS. LoS 46 days.              |
| 27 | <i>Staphylococcus aureus</i> (4/4)              | Urine: <i>Enterococcus faecalis</i>                                                                 | <i>Staphylococcus aureus</i>                             | <i>Staphylococcus aureus</i>  | <i>S. aureus</i> is clinically relevant. Diagnosis: <i>S. aureus</i> bacteraemia and SS. Los 6 days. Diseased.                                         |
| 28 | <i>Staphylococcus aureus</i> (4/4)              | Urine: <i>Escherichia coli</i>                                                                      | neg                                                      | <i>Staphylococcus aureus</i>  | <i>S. aureus</i> is clinically relevant. Diagnosis: <i>S. aureus</i> bacteraemia. No SS. LoS 12 days.                                                  |
| 29 | <i>Staphylococcus aureus</i> (4/4)              | Urine: <i>Escherichia coli</i> , <i>Staphylococcus aureus</i> ; wound: <i>Staphylococcus aureus</i> | <i>Klebsiella oxytoca</i> , <i>Staphylococcus aureus</i> | <i>Staphylococcus aureus</i>  | <i>S. aureus</i> is clinically relevant. <i>K. oxytoca</i> is OUS. Diagnosis: <i>S. aureus</i> endocarditis. No SS. LoS 28 days.                       |
| 30 | <i>Staphylococcus aureus</i> (4/4)              | NPH, wound: <i>Staphylococcus aureus</i>                                                            | <i>Staphylococcus aureus</i>                             | <i>Staphylococcus aureus</i>  | <i>S. aureus</i> is clinically relevant. Diagnosis: acute post-operative mediastinitis. No SS. LoS 10 days.                                            |
| 31 | <i>Staphylococcus aureus</i> (4/4)              | -                                                                                                   | neg                                                      | <i>Staphylococcus aureus</i>  | <i>S. aureus</i> is clinically relevant. Diagnosis: <i>S. aureus</i> bacteraemia. No SS. LoS 17 days. Diseased.                                        |
| 32 | neg                                             | -                                                                                                   | <i>Streptococcus agalactiae</i>                          | neg                           | <i>S. agalactiae</i> is OUS. SS. LoS 1 day. Diseased.                                                                                                  |

|    |                                                    |                                                                                    |                                                                      |                                   |                                                                                                                                                              |
|----|----------------------------------------------------|------------------------------------------------------------------------------------|----------------------------------------------------------------------|-----------------------------------|--------------------------------------------------------------------------------------------------------------------------------------------------------------|
| 33 | <i>Staphylococcus epidermidis</i> (4/4)            | NPH: <i>Streptococcus pneumoniae</i>                                               | <i>Staphylococcus epidermidis</i>                                    | <i>Staphylococcus epidermidis</i> | <i>S. epidermidis</i> is clinically relevant. Diagnosis: central line infection due to <i>S. epidermidis</i> . No SS. LoS 6 days.                            |
| 34 | <i>Streptococcus anginosus</i> (2/4) <sup>c</sup>  | -                                                                                  | neg                                                                  | neg                               | <i>S. anginosus</i> is clinically relevant. Diagnosis: sub-acute endocarditis. No SS. LoS 26 days.                                                           |
| 35 | <i>Streptococcus</i> group G (1/4) <sup>c</sup>    | -                                                                                  | neg                                                                  | neg                               | <i>Streptococcus</i> group G is clinically relevant. Diagnosis: soft tissue infection left leg due to <i>Streptococcus</i> group G. SS. LoS 26 days.         |
| 36 | <i>Streptococcus mitis</i> (1/4)                   | NPH: <i>Staphylococcus aureus</i>                                                  | neg                                                                  | neg                               | <i>S. mitis</i> is clinically relevant. Diagnosis: streptococcal skin infection. No SS. LoS 6 days.                                                          |
| 37 | <i>Streptococcus parasanguinis</i> (1/4)           | NPH: influenza A                                                                   | neg                                                                  | neg                               | <i>S. parasanguinis</i> is OUS. Diagnosis: influenza A, verified by PCR. No SS. LoS 5 days.                                                                  |
| 38 | <i>Streptococcus pneumoniae</i> (1/2)              | Urine: alpha streptococci, <i>Escherichia coli</i> , <i>Klebsiella pneumoniae</i>  | <i>Streptococcus pneumoniae</i>                                      | <i>Streptococcus pneumoniae</i>   | <i>S. pneumoniae</i> is clinically relevant. Diagnosis: pneumonia due to <i>S. pneumoniae</i> . SS. LoS 5 days. Diseased.                                    |
| 39 | <i>Streptococcus pneumoniae</i> (1/4) <sup>a</sup> | -                                                                                  | neg                                                                  | neg                               | <i>S. pneumoniae</i> is clinically relevant. Diagnosis: pneumonia. No SS. LoS 0 days.                                                                        |
| 40 | <i>Streptococcus pneumoniae</i> (4/4)              | -                                                                                  | <i>Streptococcus pneumoniae</i>                                      | neg                               | <i>S. pneumoniae</i> is clinically relevant. Diagnosis: pneumonia due to <i>S. pneumoniae</i> . No SS. LoS 3 days.                                           |
| 41 | <i>Streptococcus pneumoniae</i> (4/4)              | NPH: <i>Streptococcus pneumoniae</i>                                               | <i>Streptococcus pneumoniae</i>                                      | <i>Streptococcus pneumoniae</i>   | <i>S. pneumoniae</i> is clinically relevant. Diagnosis: pneumonia due to <i>S. pneumoniae</i> . SS. LoS 9 days.                                              |
| 42 | <i>Streptococcus pneumoniae</i> (4/4)              | NPH: influenza A, <i>Streptococcus pneumoniae</i> ; urine: <i>Escherichia coli</i> | <i>Streptococcus pneumoniae</i>                                      | <i>Streptococcus pneumoniae</i>   | <i>S. pneumoniae</i> is clinically relevant. Diagnosis: pneumonia due to <i>S. pneumoniae</i> . No SS. LoS 6 days.                                           |
| 43 | <i>Streptococcus pyogenes</i> (2/2)                | -                                                                                  | <i>Streptococcus pyogenes</i>                                        | neg                               | <i>S. pyogenes</i> is clinically relevant. Diagnosis: septicaemia due to <i>S. pyogenes</i> . SS. LoS 5 days.                                                |
| 44 | <i>Streptococcus pyogenes</i> (4/4)                | NPH, wound: <i>Streptococcus pyogenes</i>                                          | <i>Streptococcus pyogenes</i>                                        | <i>Streptococcus pyogenes</i>     | <i>S. pyogenes</i> is clinically relevant. Diagnosis: necrotising fasciitis due to <i>S. pyogenes</i> . Septic shock. LoS 27 days. Diseased.                 |
| 45 | neg                                                | Wound: <i>Staphylococcus aureus</i>                                                | <i>Acinetobacter baumannii</i>                                       | neg                               | <i>A. baumannii</i> is OUS. Diagnosis: infected diabetic leg ulcer. No SS. LoS 7 days.                                                                       |
| 46 | neg                                                | Urine: <i>Escherichia coli</i>                                                     | <i>Acinetobacter baumannii</i>                                       | neg                               | <i>A. baumannii</i> is OUS. Diagnosis: <i>E. coli</i> pyelonephritis. No SS. LoS 3 days.                                                                     |
| 47 | neg                                                | -                                                                                  | <i>Acinetobacter baumannii</i>                                       | neg                               | <i>A. baumannii</i> is OUS. Diagnosis: pulmonary embolism. No SS. LoS 2 days.                                                                                |
| 48 | neg                                                | Urine: <i>Escherichia coli</i>                                                     | <i>Acinetobacter baumannii</i> , <i>Stenotrophomonas maltophilia</i> | neg                               | <i>A. baumannii</i> and <i>S. maltophilia</i> are OUS. Diagnosis: chronic leg ulcer and acute soft tissue infection. Cured by oxacillin. No SS. LoS 21 days. |
| 49 | neg                                                | -                                                                                  | <i>Candida krusei</i>                                                | neg                               | <i>C. krusei</i> is OUS. Diagnosis: pneumonia verified by X-ray. No SS. LoS 20 days.                                                                         |
| 50 | neg                                                | Urine: <i>Escherichia coli</i>                                                     | <i>Candida parapsilosis</i>                                          | neg                               | <i>C. parapsilosis</i> is OUS. Diagnosis: pyelonephritis due to <i>E. coli</i> . No SS. LoS 7 days.                                                          |

|    |     |                                                                                             |                                                                          |                              |                                                                                                                                                                               |
|----|-----|---------------------------------------------------------------------------------------------|--------------------------------------------------------------------------|------------------------------|-------------------------------------------------------------------------------------------------------------------------------------------------------------------------------|
| 51 | neg | Urine: <i>Candida albicans</i>                                                              | <i>Enterobacter aerogenes</i>                                            | neg                          | <i>E. aerogenes</i> is clinically relevant. Diagnosis: abdominal abscess. No SS. LoS 34 days.                                                                                 |
| 52 | neg | NPH: coronavirus, human metapneumovirus                                                     | <i>Enterobacter cloacae</i>                                              | neg                          | <i>E. cloacae</i> is OUS. Diagnosis: adverse reaction to hydroxyurea. No infection. No SS. LoS 6 days.                                                                        |
| 53 | neg | Urine: <i>Enterococcus faecalis</i>                                                         | <i>Enterococcus faecalis</i>                                             | <i>Enterobacter cloacae</i>  | <i>E. faecalis</i> is clinically relevant. <i>E. cloacae</i> is OUS. Diagnosis: <i>E. faecalis</i> pyelonephritis. No SS. LoS 12 days.                                        |
| 54 | neg | -                                                                                           | <i>Enterococcus gallinarum</i>                                           | neg                          | <i>E. gallinarum</i> is OUS. Diagnosis: nausea. No SS. LoS 2 days. Received 1 dose of cefotaxime.                                                                             |
| 55 | neg | -                                                                                           | <i>Escherichia coli</i>                                                  | <i>Staphylococcus aureus</i> | <i>E. coli</i> is clinically relevant. <i>S. aureus</i> is OUS. Diagnosis: acute pyelonephritis. No urine culture. No SS. LoS 4 days.                                         |
| 56 | neg | -                                                                                           | <i>Escherichia coli</i>                                                  | neg                          | <i>E. coli</i> is clinically relevant. Diagnosis: acute cholecystitis. No SS. LoS 12 days. In Nov. 2011 acute cholecystitis with <i>E. coli</i> bacteraemia and septic shock. |
| 57 | neg | -                                                                                           | <i>Escherichia coli</i>                                                  | neg                          | <i>E. coli</i> is clinically relevant. Diagnosis: abscess after appendectomy. No SS. LoS 5 days.                                                                              |
| 58 | neg | Urine: <i>Escherichia coli</i>                                                              | <i>Escherichia coli</i>                                                  | neg                          | <i>E. coli</i> is clinically relevant. Diagnosis: acute pyelonephritis due to <i>E. coli</i> . No SS. LoS 1 day.                                                              |
| 59 | neg | Urine: <i>Escherichia coli</i>                                                              | <i>Escherichia coli</i>                                                  | neg                          | <i>E. coli</i> is clinically relevant. Diagnosis: <i>E. coli</i> pyelonephritis. No SS. LoS 4 days.                                                                           |
| 60 | neg | -                                                                                           | <i>Escherichia coli</i>                                                  | neg                          | <i>E. coli</i> is OUS. Diagnosis: acute purulent media otitis. No SS. LoS 5 days.                                                                                             |
| 61 | neg | Urine: <i>Escherichia coli</i>                                                              | <i>Escherichia coli</i> ,<br><i>Streptococcus pneumoniae</i>             | neg                          | <i>E. coli</i> is clinically relevant. <i>S. pneumoniae</i> is OUS. Diagnosis: acute pyelonephritis due to <i>E. coli</i> . No SS. LoS 2 days.                                |
| 62 | neg | Urine, wound: <i>Escherichia coli</i>                                                       | <i>Klebsiella oxytoca</i>                                                | neg                          | <i>K. oxytoca</i> is clinically relevant. Diagnosis: perianal abscess. No SS. LoS 8 days.                                                                                     |
| 63 | neg | -                                                                                           | <i>Klebsiella pneumoniae</i>                                             | neg                          | <i>K. pneumoniae</i> is OUS. Vomiting. Pneumonia? UTI? CRP max is 66. No SS. LoS 17 days.                                                                                     |
| 64 | neg | -                                                                                           | <i>Klebsiella pneumoniae</i>                                             | neg                          | <i>K. pneumoniae</i> is clinically relevant. Diagnosis: acute pyelonephritis. Culture negative. No SS. LoS 2 days.                                                            |
| 65 | neg | NPH: <i>Moraxella catarrhalis</i> ; urine: mixed flora; wound: <i>Staphylococcus aureus</i> | <i>Staphylococcus aureus</i>                                             | neg                          | <i>S. aureus</i> is clinically relevant. Diagnosis: infected foot ulcer and pneumonia. No SS. LoS 12 days.                                                                    |
| 66 | neg | -                                                                                           | <i>Staphylococcus aureus</i>                                             | neg                          | <i>S. aureus</i> is OUS. Diagnosis: pneumonia. No SS. LoS 1 day.                                                                                                              |
| 67 | neg | NPH: influenza A; urine: mixed flora                                                        | <i>Staphylococcus aureus</i> ,<br><i>Streptococcus</i> spp. <sup>b</sup> | neg                          | <i>S. aureus</i> and <i>Streptococcus</i> spp. are OUS. Diagnosis: influenza A verified by PCR. 4 doses of PCG. No SS. LoS 6 days.                                            |

|    |     |                                     |                                                               |                              |                                                                                                                                                                                                                      |
|----|-----|-------------------------------------|---------------------------------------------------------------|------------------------------|----------------------------------------------------------------------------------------------------------------------------------------------------------------------------------------------------------------------|
| 68 | neg | -                                   | <i>Streptococcus pneumoniae</i>                               | neg                          | <i>S. pneumoniae</i> is clinically relevant. Diagnosis: pneumonia and SS. LoS 5 days.                                                                                                                                |
| 69 | neg | -                                   | <i>Stenotrophomonas maltophilia</i>                           | neg                          | <i>S. maltophilia</i> is clinically relevant. Diagnosis: infected chronic leg ulcers. No SS. LoS 23 days.                                                                                                            |
| 70 | neg | -                                   | <i>Stenotrophomonas maltophilia, Streptococcus pneumoniae</i> | neg                          | <i>S. maltophilia</i> is OUS, <i>S. pneumoniae</i> is clinically relevant. Diagnosis: pulmonary fibrosis, suspected pneumonia. No SS. LoS 10 days.                                                                   |
| 71 | neg | NPH: human rhinovirus               | <i>Streptococcus pneumoniae</i>                               | neg                          | <i>S. pneumoniae</i> is OUS. Diagnosis: diabetic ketoacidotic. No clinical infection. No SS. LoS 3 days.                                                                                                             |
| 72 | neg | -                                   | <i>Streptococcus</i> spp. <sup>b</sup>                        | neg                          | <i>Streptococcus</i> spp. is OUS. Diagnosis: goiter. No antibiotic treatment. LoS 3 days.                                                                                                                            |
| 73 | neg | -                                   | <i>Streptococcus</i> spp. <sup>b</sup>                        | neg                          | <i>Streptococcus</i> spp. is clinically relevant. Diagnosis: acute cholangitis. No SS. LoS 11 days.                                                                                                                  |
| 74 | neg | -                                   | neg                                                           | <i>Enterobacter cloacae</i>  | <i>E. cloacae</i> is OUS. Diagnosis: neutropenic fever. No SS. LoS 5 days.                                                                                                                                           |
| 75 | neg | Wound: <i>Staphylococcus aureus</i> | neg                                                           | <i>Enterobacter cloacae</i>  | <i>E. cloacae</i> is OUS. Diagnosis: tendinitis of the hand due to <i>S. aureus</i> . No SS. LoS 7 days.                                                                                                             |
| 76 | neg | Urine: <i>Enterococcus faecalis</i> | neg                                                           | <i>Enterococcus faecalis</i> | <i>E. faecalis</i> is clinically relevant. Diagnosis: acute bronchitis (probably viral). No SS. LoS 2 days. Received one dose of tobramycin and 2 doses of penicillin G that would be effective against enterococci. |
| 77 | neg | -                                   | neg                                                           | <i>Staphylococcus aureus</i> | <i>S. aureus</i> is OUS. Diagnosis: pneumonia. No SS. LoS 4 days.                                                                                                                                                    |

LoS length of stay; neg no microbial finding was detected; NAAT nucleic acid amplification test; NPH nasopharynx; OUS of unknown significance; SS severe sepsis.

<sup>a</sup> Microbial findings were detected in blood culture bottle(s) not included in that pair of bottles used for sampling blood material for microarray analysis.

<sup>b</sup> Further speciation not provided.

<sup>c</sup> Species not included in the microarray panel.
